# Supplementary material
Source: publisher figshare collection journal article supplement (https://acs.figshare.com/ndownloader/files/24504492)
Supplement: Supplementary file 1 [file 24504492]

**Supplementary Information (Pages: 7)**

**Articular cartilage- and synoviocyte-binding poly(ethylene glycol) nano-composite microgels  
as intra-articular drug delivery vehicles for the treatment of osteoarthritis**

**Lina María Mancipe Castro<sup>a,b</sup>, Abigail Sequeira<sup>c</sup>, Andrés J. García<sup>a,b\*</sup>, Robert E. Guldberg<sup>d\*</sup>**

<sup>a</sup> Parker H. Petit Institute for Bioengineering and Biosciences, Georgia Institute of Technology  
315 Ferst Dr NW, Atlanta, GA 30332, U.S.A.

<sup>b</sup> George W. Woodruff School of Mechanical Engineering, Georgia Institute of Technology  
315 Ferst Dr NW, Atlanta, GA 30332, U.S.A.

[lmnc6@gatech.edu](mailto:lmnc6@gatech.edu)

<sup>c</sup> School of Chemical and Biomolecular Engineering, Georgia Institute of Technology  
**311 Ferst Drive NW, Atlanta, GA 30332, U.S.A.**

[asequeira3@gatech.edu](mailto:asequeira3@gatech.edu)

<sup>a</sup> Parker H. Petit Institute for Bioengineering and Biosciences, Georgia Institute of Technology  
315 Ferst Dr NW, Atlanta, GA 30332, U.S.A.

<sup>b</sup> George W. Woodruff School of Mechanical Engineering, Georgia Institute of Technology  
315 Ferst Dr NW, Atlanta, GA 30332, U.S.A.

[andres.garcia@me.gatech.edu](mailto:andres.garcia@me.gatech.edu)

<sup>d</sup> Phil and Penny Knight Campus for Accelerating Scientific Impact, University of Oregon  
6231 University of Oregon, Eugene, OR 97403-6231

[guldberg@uoregon.edu](mailto:guldberg@uoregon.edu)

\* co-corresponding authors

### **Supplementary Information:**

This file includes:

Supplementary materials and methods.

Fig. S1. Chemical structure of A) poly(lactic-co-glycolic) acid and B) 4-arm poly(ethylene glycol) maleimide.

Fig. S2. PLGA NP encapsulation into PEG-4MAL microgels.

Fig. S3. Self-quenching effect of peptide-functionalized PEG-4MAL microgels was evaluated in vitro.

Fig. S4. Stability of WYR peptide-functionalized PEG-4MAL nano-composite microgels in vivo.

## 1. Supplementary materials and methods

### 1.1. Materials

Poly(lactic-co-glycolic) acid (50:50, MW: 24,000 - 38,000 Da), poly-vinyl-alcohol (PVA, MW: 31,000 - 50,000 Da, 87-89% hydrolyzed), dichloromethane (DCM, anhydrous,  $\geq 99.8\%$ ), mineral oil, SPAN80, bovine serum albumin (BSA,  $\geq 98\%$ ), rhodamine B ( $\geq 95\%$ ), Optiprep™ density gradient medium and methanol (anhydrous, 99.8%) were purchased from Sigma-Aldrich. Four-arm poly(ethylene-glycol)-maleimide (PEG-4MAL (20 kDa) was acquired from Laysan Bio, phosphate buffered saline with  $\text{Ca}^{++}$  and  $\text{Mg}^{++}$  ( $\text{PBS}^{+/+}$ ) from Corning, HEPES buffer (1M) from Life Technologies. Ultra-pure dithiothreitol (DTT), Gibco™ Ham's F12 nutrient mix, CellTracker Green™ and Alexa Fluor™ 488-NHS ester were purchased from Thermo Fisher Scientific. Articular cartilage-, synoviocyte- or integrin-binding peptides (WYR, HAP-1 and RGD) and their scrambled sequences (WYRsc, HAP-1sc and RDG) were custom-synthesized by GenScript. Near-infrared (NIR) dyes cyanine 7 (Cy7), sulfo-cyanine 7 and cyanine 7-NHS ester were purchased from Lumiprobe Life Science Solutions, and Conray contrast agent (60%) was obtained from Henry Schein™. HIG-82, C2C12 and SW982 cell lines were purchased from ATCC and MC3T3-E1 from RIKEN. Male Lewis rats (250-300g) were acquired from Charles River Laboratories.

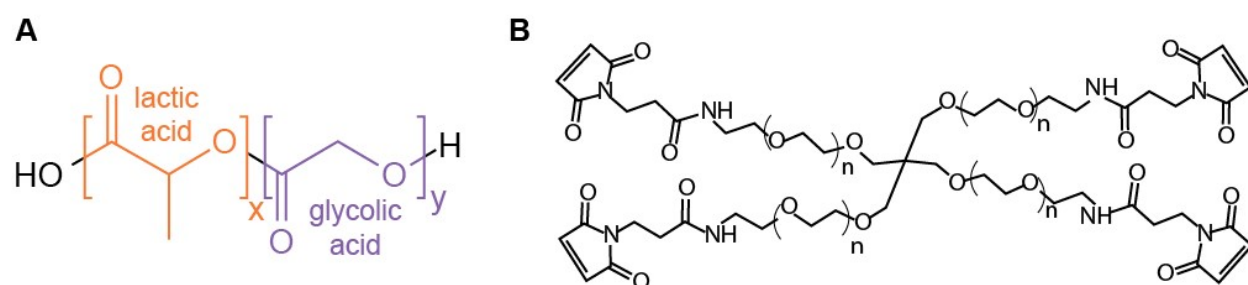

Figure S1. Chemical structure of A) poly(lactic-co-glycolic) acid and B) 4-arm poly(ethylene glycol) maleimide.

### *1.2. PLGA NP distribution within PEG-4MAL microgels*

Confocal microgel images containing either 0.25, 0.50 or 1.00% w/v PLGA NPs were used to determine their distribution within PEG-4MAL microgels using a customized MATLAB script. Rhodamine B-loaded PLGA NPs content inside individual microgels was measured as the microgel's cross-sectional area fraction corresponding to fluorescent pixels. For each formulation, a distribution of the PLGA NPs content per microgel was generated using at least 200 microgels per group.

### *1.3. WYR-functionalized PEG-4MAL/PLGA NPs microgel in vivo stability*

To determine the ability of PEG-4MAL/PLGA NPs microgels to withstand the IA mechanical loads, fluorescently labeled microgels were synthesized by conjugating WYR peptide to AlexaFluor 488-NHS ester, prior to microgels formation according to manufacturer's instructions. Then, microgels containing 0.5% w/v PLGA NPs were injected bilaterally in healthy knee joints of male Lewis rats (50 $\mu$ L/injection, microgels suspended in sterile saline). A knee lavage using 100  $\mu$ L of sterile saline was performed on days 4, 8, 14 and 21 (2 knees per time point). Then, 100  $\mu$ L of the recovered lavage were incubated with 50  $\mu$ L of lysis buffer for 2 min to remove any cells and imaged using confocal microscopy. The size of at least 80 microgels per time point was calculated using a customized MATLAB script (MATLAB, v 9.7 (R2019b), Natick, Massachusetts: The MathWorks Inc.).

## 2. Supplementary data

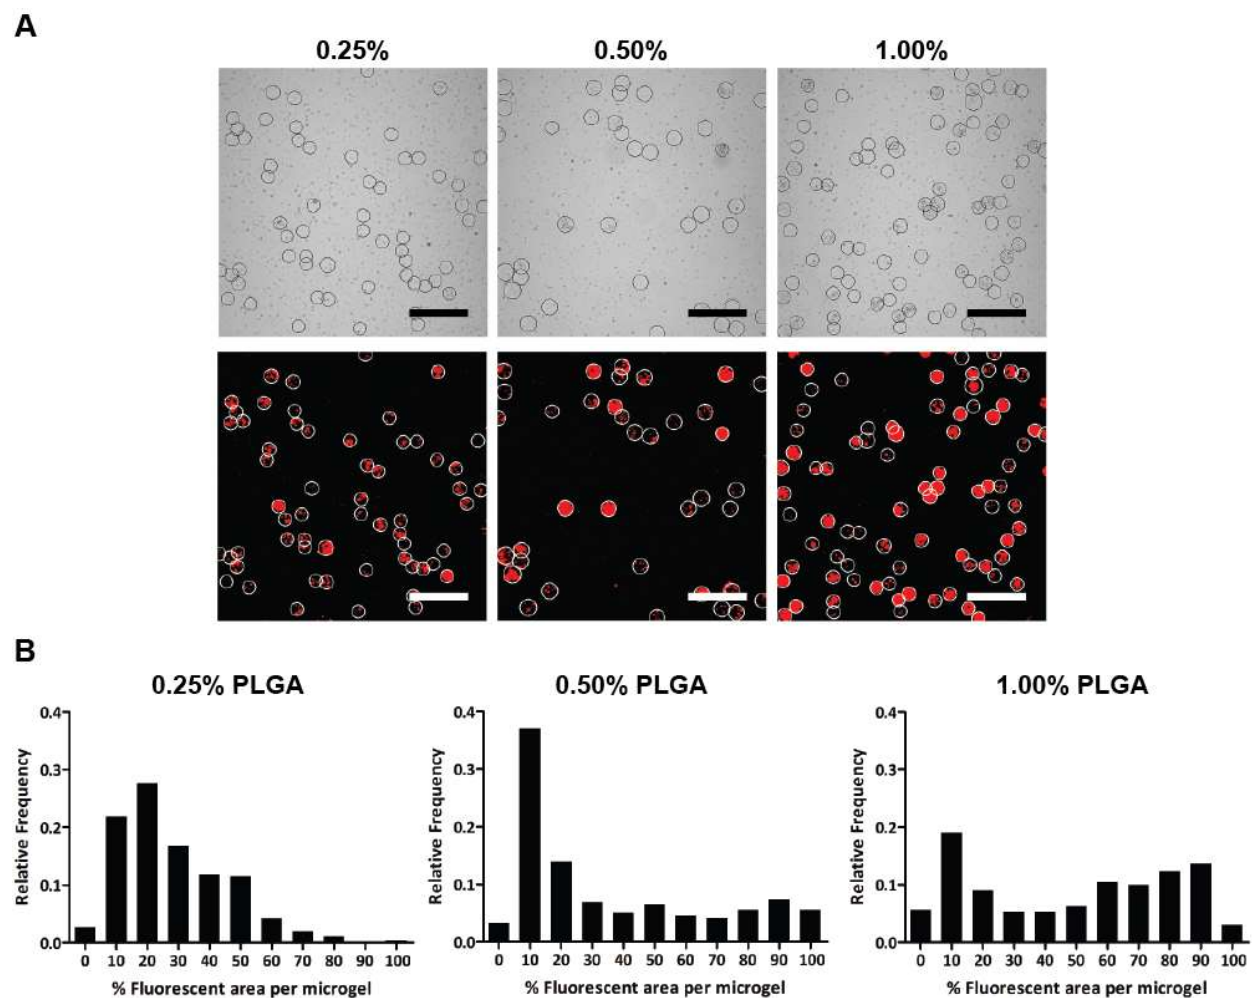

**Figure S2. PLGA NP encapsulation into PEG-4MAL microgels.** A) Representative confocal images of microgels containing 0.25, 0.50 or 1.00% w/v PLGA NPs. Bright field (top) and red fluorescence (below) channels, with microgels outlined with white circles. Scale bar: 200  $\mu\text{m}$ . B) Distribution of PLGA NPs inside PEG-4MAL microgels measured as the microgels area fraction corresponding to fluorescent pixels. Results demonstrate that PLGA NPs distribution into PEG-4MAL microgels shifts from a unimodal to a bimodal distribution as the PLGA NP concentration increases.

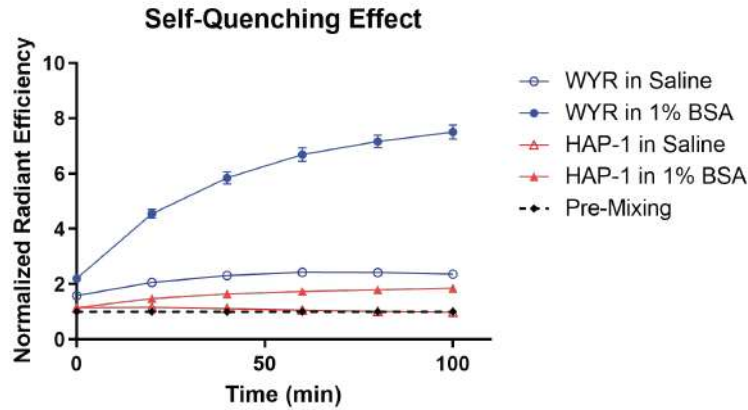

Figure S3. Self-quenching effect of peptide-functionalized PEG-4MAL microgels was evaluated *in vitro*. WYR and HAP-1 peptide were conjugated with Cy7-NHS ester dye prior to microgels synthesis. Microgels (50  $\mu$ L) were placed in a 96-well plate and their radiant efficiency was measured (n=8). 50  $\mu$ L of saline (control) or a solution of 1% BSA was added to the microgels formulations (n=4). This was done to simulate the *in vivo* IA injection scenario where microgels suspended in saline mix with synovial fluid, represented here by the 1% BSA solution. Microgels radiant efficiency was measured via IVIS immediately after mixing and every 20 min up to a total of 100 min. Radiant efficiency at each time point was normalized to the pre-mixing fluorescence. Results demonstrate that an apparent increase in fluorescence occurs after diluting both microgels formulations with either saline or 1% BSA. Interestingly, this effect is more pronounced when diluting the microgels in 1% BSA. This occurs because the solution of 1% BSA is a better solvent than saline only and helps solubilize Cy7. Also, WYR-functionalized PEG-4MAL microgels presented a considerably higher degree of self-quenching compared to HAP-1 microgels as measured by a difference in the plateau values obtained after a one-phase association curve fit (Welch's ANOVA,  $p < 0.0001$ ).

**A**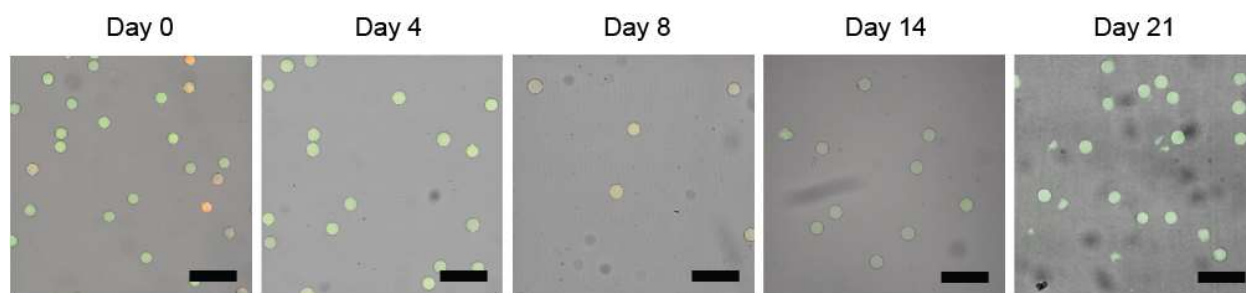**B****Microgels Area Distribution after Intra-Articular Injection**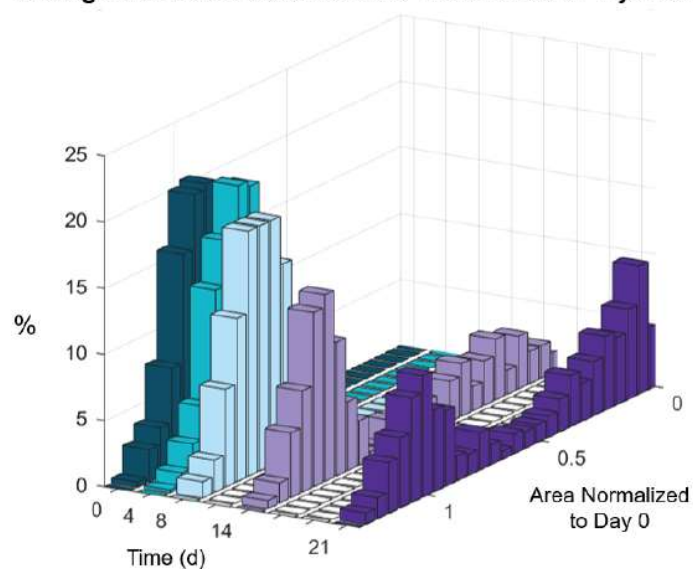

**Figure S4. Stability of WYR peptide-functionalized PEG-4MAL nano-composite microgels *in vivo*.** A) Representative confocal images of PEG-4MAL microgels (green) recovered via intra-articular lavage. Microgel size is reduced by day 14 leading to presence of smaller, irregular hydrogel fragments. Scale bar: 200  $\mu\text{m}$ . B) Microgel area histogram at different time points after intra-articular injection demonstrate that at days 14 and 21 smaller microgels are observed (Distributions obtained from the lavage of 2 knees at every time point).
